# Supplementary material for: Constructing a bilingual website with validated database for Herb and Western medicine interactions using Ginseng, Ginkgo and Dong Quai as examples
Source: BMC Complement Altern Med. 2019 Nov 27;19:335. doi: 10.1186/s12906-019-2731-1 (PMC6881993; doi:10.1186/s12906-019-2731-1)
Supplement: Supplementary file 1 — Additional file 1: Table for HDIs. [file 12906_2019_2731_MOESM1_ESM.xlsx]

## Sheet: 80 HDIs
序號	輔助藥物或食品英文名稱	輔助藥物或食品中文名稱	輔助藥物或食品學名	輔助藥物或食品複方	輔助藥物或食品成份中文名稱	輔助藥物或食品成份英文名稱	西藥	交互作用結果	研究設計	In vitro	In vivo 動物實驗	個案人數	病人情況描述(含劑量等)	機制	臨床處置建議(implication)	原始文獻篇名	原始文獻作者	原始文獻期刊名含頁碼	原始文獻網址連結
id	herb_en	herb_zh	herb_scientific	herb_compound	herb_composition_zh	herb_composition_en	drug	interaction	study_design	in_vitro	in_vivo_animal	case_population	patient_situation	mechanism	implication	source_title	source_author	source_citation	source_url
Simple	Simple	Simple	Simple	Simple	Simple	Simple	Simple	Simple	Simple	Simple	Simple	Simple	Simple	Simple	Simple	Simple	Simple	Simple	Simple
1	Ginseng	Ginseng人參					Caffeine	Possible; Combined caffeine with acute supplementation of Panax ginseng improved endurance performance of recreational runners (人參併用咖啡因能促進體能耐力)	heat adapted healthy runners (適應熱環境之跑者)	N	N	9	healthy volunteers supplemented with caffeine (5 mg/kg) and 200 mg of Panax Ginseng one hour before the running on treadmill (健康受試者跑步前一小時併用咖啡因能促進人參的體能耐力)	unclear; may due to Chronic supplementation of Panax ginseng enhances physical performance (未明；可能與長期服用人參所促進體力表現有關)	single supplementation did not show difference, but chronic combination users still need to be cautious no more than 3 g/d to avoid possible hypertension, nervousness, sleep-lessness, skin eruptions and morning diarrhoea (單一小劑量併用無影響或可舒張血管；但長期併用應注意每日人參劑量須小於3克避免高血壓、緊張、失眠等副作用)	Effects of acute supplementation of caffeine and Panax ginseng on endurance running performance in a hot and humid environment.	Bandyopadhyay A, Ping FW, Keong CC.	J Hum Ergol (Tokyo). 2011 Dec;40(1-2):63-72.	https://www.ncbi.nlm.nih.gov/pubmed/25665208
2	Panax ginseng	Panax ginseng人參	energy dring				Imatinib	Possible; suffered from right upper abdominal pain, liver biopsy turned out acute lobular hepatitis (合併人參飲品三月誘發急性小葉肝炎)	case report ; 26-yr-old male leukemia patient (個案報告)	N	N	1	7 years of the antileukemia drug imatinib 400 mg/d treatment and then consumed ginseng energy drinks for 3 month (服用imatinib 400 mg/d 7年, 併用人參飲品3月)	ginseng inhibits CYP3A4, and causes rise in concentration of imatinib to the toxic level (人參抑制 CYP3A4繼而造成imatinib血中濃度上升)	avoid combind used or continuous monitoring of liver function tests (避免併用或監測肝功能)	Imatinib and Panax ginseng: a potential interaction resulting in liver toxicity.	Bilgi N, Bell K, Ananthakrishnan AN, Atallah E.	Ann Pharmacother 2010; 44: 926–8.	https://www.ncbi.nlm.nih.gov/pubmed/20332334
3	Ginseng	Ginseng人參					Digoxin	Possible; cardiac index (CI),stroke volume index (SVI) combind group were increase than the others (心臟功能及心輸出提升)	Randomized Controlled Trial; 45 cases with class iV heart function (隨機臨床對照試驗)	N	N	45	3 group randomly Ginseng, digoxin and combind.(人參組 digoxin組及併用組)	red Ginseng and digoxin had synergism for treatment of congestive heart failure (紅參與digoxin有協同效應)	combined use of them could slightly increase clinical effect (併用可增加臨床效果)	Effects of red ginseng on the congestive heart failure and its mechanism.	Ding, D.Z.; Shen, T.K.; Cui, Y.Z.	Zhongguo Zhong Xi Yi Jie He Za Zhi (Chinese J. Integ. Trad. Western Med.), 1995, 15(6), 325-327.	https://www.ncbi.nlm.nih.gov/pubmed/7549378
4	Ginseng	Ginseng人參				ginsenoside	Warfarin	Unevaluable; co-administration warfarin with ginsenosides decreased INR values enhanced by warfarin (併用降低warfarin所調升INR之藥效)	co-administration of 0.4 mg/kg warfarin with ginsenosides reduced warfarin levels, restored the suppressed levels by warfarin of the coagulating factors in thrombosis model of rats (併用三週降低warfarin調升INR之藥效及其濃度)	N	Y	N	N	enhanced activities of P450 3A4 and 2C9 that metabolize warfarin (併用人參增加藥物代謝酵素活性以致藥物濃度下降)	ginseng-warfarin interaction that may be dangerous to patients who are under daily necessary warfarin anticoagulation(併用兩藥物可能會增加血栓風險)	Global deregulation of ginseng products may be a safety hazard to warfarin takers: solid evidence of ginseng-warfarin interaction	Dong H, Ma J, Li T, Xiao Y, Zheng N, Liu J, Gao Y, Shao J, Jia L.	Sci Rep. 2017 Jul 19;7(1):5813.	https://www.nature.com/articles/s41598-017-05825-9
5	Asian ginseng root	Asian ginseng root人參		Ginsana		ginsenoside	Warfarin	Likely; INR decreased while combined treatment (凝血因子控制不良因其INR 下降)	case report (個案報告)	N	N	1	two weeks of ginseng (Ginsana; ginsenoside-100 mg/capsule) TID decreased INR from 3.1 to 1.5 in patient with mechanical heart valve received warfarin 5 mg/d (個案自行併用300 mg/d人參膠囊兩週後INR明顯下降)	unclear; possible due to changes of CYP activity or metabolism or hematopoiesis. Two weeks after discontinuation of ginseng, the patient's INR returned to 3.3(併用人參增加藥物代謝酵素活性或改變凝血功能，停用人參可恢復INR目標值)	Probable interaction between warfarin and ginseng (併用兩藥物可能會增加血栓風險)	Probable interaction between warfarin and ginseng.	Janetzky K, Morreale AP.	Am J Health Syst Pharm. 1997 Mar 15;54(6):692-3.	https://www.ncbi.nlm.nih.gov/pubmed/9075501
6	Asian ginseng root	Asian ginseng root人參					Warfarin	Likely; INR and platelet aggregation were not affected by treatment with ginseng (經實驗結果INR 與血小板凝集無統計學上之顯著差異.)	a randomized, open-label, three-way; crossover study; n=12 healthy male divide into 3 group. (隨機臨床對照試驗)	N	N	12	7 days' pretreatment with ginseng, co-administration with a single 25-mg dose of warfarin.(投與人參一周併用warfarin)	Korean ginseng had little effect on warfarin metabolism or effect in healthysubjects.(韓國紅參不影響warfarin代謝及藥效)	Coadministration of warfarin with ginseng did not affect the pharmacokinetics or pharmacodynamics (人參不影響warfarin藥物動力學及藥效學)	Effect of St. John's wort and ginseng on the pharmacokinetics and pharmacodynamics of warfarin in healthy subjects.	Jiang, X., Williams, K.M., Liauw, W.S., Ammit, A.J., Roufogalis, B.D., Duke, C.C., Day, R.O., McLachlan, A.J., 2004.	British Journal of Clinical Pharmacology 57 (5), 592–599.	https://www.ncbi.nlm.nih.gov/pubmed/15089812
7	Ginseng	Ginseng人參		ginseng.			Warfarin	Possible; cotreatment of ginseng orally increased the clearance of S-warfarin but no clinical significant (人參會增加 S-warfarin清除率；但無臨床意義)	A randomized crossover study;healthy subjects n=24(健康受試者隨機臨床對照試驗)	N	N	24	healthy subjects received a single dose of 25 mg warfarin and ginseng (檢測健康受試者併用人參與 25 mg warfarin之藥物動力學參數)	increased the clearance of S-warfarin (增加 S-warfarin清除率)	no clinical effects; however, gisneng increased the clearance of S-warfarin in healthy volunteers. Monitoring INR while coadministration of warfarin with ginseng (對健康人服用warfarin無臨床改變結果，但下降其warfarin濃度，併用時需監測)	Investigation of the effects of herbal medicines on warfarin response in healthy subjects: a population pharmacokinetic-pharmacodynamic modeling approach.	Jiang, X.; Blair, E. Y.; McLachlan, A. J.	J. Clin. Pharmacol., 2006, 46(11), 1370-1378.	https://www.ncbi.nlm.nih.gov/pubmed/17050802
8	Ginseng	Ginseng人參	Panax ginseng C.A. Meyer (Araliaceae)		人參皂甘	Ginsenoside	Warfarin	Likely; international normalized ratio (INR) and prothrombin time (PT) improved in both groups, but no differences between two groups (兩者之間的交互作用經實驗結果無統計學上之顯著差異.)	patients by randomized open-label, controlled study (隨機臨床對照試驗) in patients with ischemic stroke	N	N	25	Ischemic stroke patients treated by warfarin (dose less than 2 mg in 1st week and 5 mg in 2nd week) with or without 0.5 g ginseng three times per day (缺血性中風25位病人在第一個禮拜時給予warfarin 2mg/天, 第二個禮拜 5mg/天；其中12位額外合併給予人參 0.5g 1天3次 持續2個禮拜)	N	coadministration of P. ginseng and warfarin did not influence the pharmacologic action of warfarin in ischemic stroke patients (對於缺血性中風的病人，Panax.ginseng 1.5 g/day 不會與warfarin產生交互作用)	Interaction between warfarin and Panax ginseng in ischemic stroke patients.	Lee SH., Ahn YM., Ahn SY., Doo HK., Lee BC.	J Altern Complement Med 2008 Jul;14(6):715-21	https://www.ncbi.nlm.nih.gov/pubmed/18637764
9	Red Ginseng	Ginseng人參	Panax ginseng	Ginsenosides			Methotrexate	Unevaluable; the AUC or exposures of methotrexate significantly increased in the RGE repeated administration in rats (持續一週口服每日1.5 g/kg GRE使methotrexate AUC/體內總量顯著上升)	pharmacokinetic changes of methotrexate (iv.3 mg/kg) in rats treated with oral RGE (1.5 g/kg/day) for one week (分析已持續一週口服每日1.5 g/kg GRE對大鼠靜脈注射3 mg/kg methotrexate 藥物動力學之影響)	N	Y	N	N	Repeated high doses of red ginseng could decrease Mrp2 expression, which is crucial for the elimination of methotrexate (持續一週口服每日1.5 g/kg GRE可能藉由降低負責代謝MTX之Mrp2表現量已致於下降其排出率)	both possess effects for reducing the symptoms of rheumatoid arthritis and the clinical significance of observed interactions need to be determined (兩者具改善風濕性關節炎症狀；可能加成療效或增加MTX副作用等臨床意義可再進行人體研究)	Effects of Red Ginseng Extract on the Pharmacokinetics and Elimination of Methotrexate via Mrp2 Regulation	Sowon Lee, Mihwa Kwon, Min-Koo Choi, and Im-Sook Song	Molecules. 2018 Nov; 23(11): 2948.	https://www.ncbi.nlm.nih.gov/pubmed/30424502
10	Ginseng	Ginseng人參	Korean White Ginseng Root				Aspirin	Possible; Combination of these herbal products with aspirin did not further aggravate platelet inhibition caused by aspirin (併用不影響血小板凝集)	healthy volunteers in randomized, double-blind, controlled trial, prospective interventional study (健康人隨機雙盲前瞻性臨床試驗)	N	N	25	Each subject underwent 3 phases: herbal product alone, aspirin alone and aspirin with herbal produc (健康受試者分別接受人參, aspirin及併用後的測試)	N	lack of bleeding risks either used alone or in combination with aspirin in healthy volunteers (健康人併用不會增加出血危險)	A randomized, double-blind, placebo- controlled study on the anti-haemostatic effects of Curcuma longa, Angelica sinensis and Panax ginseng.	Fung FY, Wong WH, Ang SK, Koh HL, Kun MC, Lee LH, Li X, Ng HJ, Tan CW, Zhao Y, Linn YC.	Phytomedicine. 2017 Aug 15;32:88-96.	https://www.ncbi.nlm.nih.gov/pubmed/28732813
11	Panax ginseng	Panax ginseng人參					Aspirin	Possible; full blood counts, PT/aPTT, platelet function tests and thrombin generation assays were normal with and without aspirin (人參並用 Aspirin不會影響凝血相關功能)	A randomized, double-blind, placebo-controlled crossover study in healthy volunteers (健康人隨機雙盲臨床對照試驗) Ginseng group n=25	N	N	75	healthy volunteers were randomly assigned to take Ginseng 1000 mg/d or placebo for 3 weeks, then added aspirin 100 mg/d for 3 weeks (健康受試者先使用1000 mg/d人參或安慰劑三週後再併用 100 mg/d aspirin)	ginseng addition to aspirin did not further impair hemostatic functions (人參不會加強Aspirin效果)	There was no significant clinical events reported, in particular no bleeding complications (健康人有先服用人參不會增加aspirin出血危險)	A Randomized, Double Blind, Placebo-Controlled, Cross-over Study to Evaluate the Haemostatic Effects of Three Commonly Used Traditional Herbal Medicines, (Curcuma Longa, Angelicae Sinensis and Panax Ginseng)and Their Interactions with Aspirin	Lai Heng Lee, Chuen Wen Tan, Wan Hui Wong, Foon yin Fung, Hwee Ling Koh, Yan Zhao, Mei Ching Kun, Xiao Mei Li, Heng Joo Ng, Seng Kok Ang, and Yeh Ching Linn	Blood 2015 126:2323;	http://www.bloodjournal.org/content/126/23/2323?sso-checked=true
12	Ginseng-based oral lozenges	Ginseng人參					Raltegravir plus lopinavir/ritonavir	Possible; resulted in raltegravir adverse reactions such as generalized pruritus, scratching lesions, increased transaminase, visible jaundiced skin and mucous membranes (產生藥物副作用譬如皮膚搔癢,皮疹,轉胺酶指數上升)	HIV case report of 56-year-old white Caucasian man with sexual disability (個案報告)	N	N	1	patients treated with 400 mg raltegravir plus lopinavir/ritonavir 400/100 mg, ginseng-based tablets starting approximately 39 days (愛滋病患接受400 mg raltegravir plus lopinavir/ritonavir 400/100 mg於併用人參39日後檢測其影響)	ginseng is involved in the episode through CYP3A4 inhibition, resulting in elevated plasma concentrations of raltegravir (人參可能經抑制代謝酵素CYP3A4而致raltegravir血中濃度上升)	clinicians should be alert when managing patients on other CYP3A4-metabolized drugs or previous liver-damaging conditions (服用經代謝酵素CYP3A4代謝之藥品或肝功能不良者，須留意是否有併用人參)	Elevated liver enzymes resulting from an interaction between raltegravir and Panax ginseng: a case report and brief review.	Mateo-Carrasco H, Gálvez-Contreras MC, Fernández-Ginés FD, Nguyen TV.	Drug Metabol Drug Interact 2012; 27:171–5.	https://www.ncbi.nlm.nih.gov/pubmed/23092794
13	Siberian ginseng	Siberian ginseng人參(西伯利亞)	Eleutherococcus senticosus			Eleutherosides	Digoxin	Possible; Elevated plasma digoxin levels (Digoxin血中濃度上升)	case report of 74-year-old man with atrial fibrillation (個案報告)	N	N	1	take 0.25 mg/d digoxin, resumed taking ginseng several months later, and the serum digoxin level again rose (心房顫動74歲男子服用一天0..25mg digoxin於併用西伯利亞人參，經檢測其digoxin level上升，之後再試亦然)	N	Stop using ginseng and document whether there is the other nonprescribed medications or natural products were used (停用西伯利亞人參且需詢問病人是否有使用非處方藥物或者其它中藥）	Elevated serum digoxin levels in a patient taking digoxin and Siberian ginseng.	McRae S	CMAJ. 1996 Aug 1;155(3):293-5.	https://www.ncbi.nlm.nih.gov/pubmed/8705908
14	Ginseng	Ginseng人參					Lamotrigine	Possible; pruritic rash, headache, myalgias, eosinophilia, elevated liver enzymes and related to DRESS syndrome probable cause (score of 5; 可能產生DRESS不良副作用)	case report (個案報告)	N	N	1	A 44-year-old white man had also been taking deer antler velvet and ginseng experienced a possible seizure and treated with lamotrigine by up-titration to a goal dosage of 150 mg twice/day but continued ginseng (經常服用人參的病人於接受 lamotrigine治療癲癇後產生DRESS不良副作用；即使恢復單用較高劑量人參又出現類似症狀)	may result from ginseng's inhibition of the uridine diphosphate glucuronosyltransferase 2B7 enzyme, similar to the mechanism of the interaction with valproic acid (與人參抑制2B7酵素有關)	Clinicians should be aware of this probable drug interaction and avoid coadministration of ginseng and lamotrigine or use a more conservative dose titration of lamotrigine for patients who are also taking ginseng (過去有癲癇或過敏病史者如有服用人參時應注意其復發風險或要保守給予lamotrigine劑量)	Drug reaction with eosinophilia and systemic symptoms syndrome probably induced by a lamotrigine-ginseng drug interaction.	Myers AP, Watson TA, Strock SB.	Pharmacotherapy. 2015 Mar;35(3):e9-e14.	https://www.ncbi.nlm.nih.gov/pubmed/25756365
15	American ginseng (Panax quinquefolius L.)	American ginseng (Panax quinquefolius L.)美國人參					Hypoglycemic agents	Possible; postprandial glycemia significant reductions were observed while ginseng was taken 40 minutes before the challenge (服用人參組較安慰劑組之飯後血糖值低)	Randomized Controlled Trial in nondiabetic subjects and 9 subjects with type 2 DM (隨機臨床對照試驗)	N	N	19	subjects supplemented with 3-g ginseng or placebo capsules before 40 mins 25-g oral glucose challenge (服用3-g人參或安慰劑40分鐘後分別接受葡萄糖耐受測試)	unknown, may due to increase NO stimulated glucose-dependent secretion of insulin (機制未明但可能與人參增加NO促進胰島素分泌作用有關)	nondiabetic AND type 2 diabetes mellitus to take ginseng with meals.(人參須與食物併服)	American ginseng (Panax quinquefolius L.) reduces postprandial glycemia in nondiabetic subjects and subjects with type 2 diabetes mellitus.	Vuksan, V., Sievenpiper, J.L., Koo, V.Y., Francis, T., Beljan-Zdravkovic, U., Xu, Z., Vidgen, E.	Archives of Internal Medicine 2000; 160 (7), 1009–1013.	https://www.ncbi.nlm.nih.gov/pubmed/10761967
16	Ginseng	Ginseng人參					Yohimbine	Possible; May result in manic-like symptoms(可能導致狂躁症狀)	case report (個案報告)	N	N	1	A man developed hypomania while using ginseng and yohimbine for erectile dysfunction, and had a recurrence of mania after stopping yohimbine but increasing his daily intake of ginseng. (接受yohimbine治療的病人於併服人參後產生輕度狂躁症狀；即使恢復單用較高劑量人參又出現類似症狀)	unclear (未明)	Symptoms of mania fully remitted within days upon discontinuation of ginseng and supportive treatment (長期過量單用人參或者併用其他藥物可能會造成狂躁情緒；立即停用人參可緩解)	Manic psychosis associated with ginseng: a report of two cases and discussion of the literature.	Norelli LJ, Xu C.	J Diet Suppl. 2015 Jun;12(2):119-25.	https://www.ncbi.nlm.nih.gov/pubmed/24689505
17	Ginseng	Ginseng人參	Vietnamese ginseng				Morphine	Unevaluable; saponin and majonoside-R2 reduced the analgesic effects of morphine in mice (人參皂苷或majonoside-R2 減少Morphine的止痛效果）	using tail-pinch/hot-plate tests to test ginseng on morphine-induced antinociception and the development of morphine toleranceafter repeated administration in mice (利用小鼠尾夾和熱板試驗檢測人參對morphine引起的止痛效果及重複投予對嗎啡耐受度影響)	N	Y	N	N	attenuate the antinociception and negatively modulate the function of the descending monoaminergic neuronal systems (人參經由負調控單胺神經系統傳導而降低止痛效果)	Vietnamese ginseng 25 mg/kg saponin and 6.2 mg/kg majonoside-R2, as well as 2 mg/kg naloxone (越南人參皂甘 25 mg/kg saponin或6.2 mg/kg majonoside-R2與 2 mg/kg naloxone有類似效果)	Effects of vietnamese ginseng on opioid agonist - and conditioned fear stress-induced antinociception.	Huong NT, Matsumoto K, Yamasaki K, Duc NM, Nham NT, Watanabe H.	Phytomedicine. 1996 May;3(1):33-9.	https://www.ncbi.nlm.nih.gov/pubmed/23194858
18	Asian ginseng root	Asian Ginseng人參(亞洲)					Warfarin	Possible; inadequate anticoagulation levels that occurred after a period of self-medication with a ginseng product (人參造成抗凝血INR指標下降)	case report of a 58-year-old man with past history ​prosthetic aortic valve thrombosis (人工主動脈瓣血栓個案報告)	N	N	1	patient was on stable warfarin, but reported taking ginseng product was admitted to the hospital with acute anterospectal myocardial infarction (病患服用Warfarin穩定但併用人參後檢測其INR下降，爾後就醫經診斷有急性心梗塞等問題)	N	Asian ginseng should be avoided in patients receiving warfarin because of the risk of thrombotic complications (有血栓問題接受warfarin控制者需避免使用人參)	Thrombosis of a prosthetic aortic valve disclosing a hazardous interaction between warfarin and a commercial ginseng product.	Rosado MF.	Cardiology. 2003;99(2):111.	https://www.ncbi.nlm.nih.gov/pubmed/12711887
19	Korean red ginseng	Korean red ginseng韓國紅人參					Warfarin	Possible; no significant effect on INR up to 3 wks combination (3-6週併用對病患INR值無明顯差異)	patients by randomized, double-blind, two-period crossover study (隨機雙盲交叉試驗)	N	N	25	in patients with cardiac valve replacement followed by warfarin with good INR (心瓣膜置換術後服用warfarin病人在分別為對照或Korean red ginseng 1 g 6週; 再互換給藥順序)	related to inhibits the synthesis of thromboxane A2 or the presence of vitamin K (可能經抑制TXA2而造成血小板凝集下降呈現抗血小板作用；或因韓國紅人參另含Vit.K而對抗warfarin作用)	Korean red ginseng could be used in patients who take warfarin. (韓國紅人參可以和warfarin併用但仍需監測及教育病患)	Interaction between warfarin and Korean red ginseng in patients with cardiac valve replacement	Lee YH, Lee BK, Choi YJ, Yoon IK, Chang BC, Gwak HS.	Int J Cardiol. 2010; 145(2):275-276.	http://www.ncbi.nlm.nih.gov/entrez/query.fcgi?cmd=Retrieve&db=PubMed&dopt=Citation&list_uids=19913311
20	American ginseng	American ginseng人參(美洲)	Panax quinquefolius				Warfarin	Possible; International normalized ratio (INR) decreased (降低warfarin 抗凝血效果）evidence level: 4	a 20 young healthy volunteers, randomized, controlled Trial (臨床試驗)	N	N	20	assigned to receive either American ginseng or placebo for 3 weeks. After warfarin (< therapeutic dose) was co-administered for 3 days, INR and warfarin levels were monitored (健康人於第二週開始分組服用American ginseng或者安慰劑三週；於第四週再給予低於一般治療劑量的warfarin 三日後檢測INR, warfarin濃度)	Peak INR and peak plasma warfarin level were positively correlated (抗凝血效果下降與warfarin 濃度正相關)	should ask patients about ginseng use if taking warfarin. Titrate up warfarin dose while combination with American ginseng (需詢問須服用warfarin之病人是否有習慣服用人參；併用時Warfarin劑量可能須調升) Level of evidence: 4	Brief communication: American ginseng reduces warfarin's effect in healthy patients: a randomized, controlled Trial.	Yuan CS, Wei G, Dey L, Karrison T, Nahlik L, Maleckar S, Kasza K, Ang-Lee M, Moss J.	Ann Intern Med. 2004 Jul 6;141(1):23-7.	https://www.ncbi.nlm.nih.gov/pubmed/15238367
21	Ginseng	Ginseng人參		Sheng Mai-yin	生脈飲即人參麥冬五味子		Warfarin	Possible; Consciousness disturbance, right hemiplegia and active pupils, increased INR; intracerebral hematoma (個案意識混亂右半腦出血INR值上升)	case report of 71-year-old man with with aortic valve and mitral valve replace and INR= 5.08 (個案報告)	N	N	1	patient treated with 2.25 mg/d warfarin, 10 mL/d mentshengmai-yin for 7 days (患者使用Warfarin併用7天生脈飲即人參麥冬五味子)結果發生急性心肌梗塞	increasing the production of tissue plasminogen activators, which suppress the formation of thrombin in the blood coagulation and fibrinolysis mechanisms (人參增加 tissue plasminogen activators繼而抑制凝血機制與作用)	avoid herbal medication that can interact with warfarin (需避免併用)	Interaction between warfarin and the herbal product shengmai-yin: a case report of intracerebral hematoma.	Su Q, Li Y.	Yonsei Med J 2010; 51: 793-6.	https://www.ncbi.nlm.nih.gov/pubmed/20635460
22	Ginseng	Ginseng人參					Warfarin	Unevaluable; no effects on pharmacokinetics of warfarin in presence of ginseng (人參不影響warfarin藥物動力學)	warfarin pharmacokinetics have been shown to be unaltered by a single dose of 2mg/kg ginseng in rats (單次給予 2mg/kg人參不影響大鼠warfarin藥動學參數)	N	Y	N	N	N	N	Possible influences of ginseng on the pharmacokinetics and pharmacodynamics of warfarin in rats.	Zhu, M.; Chan, K.W.; Ng, L.S.; Chang, Q.; Chang, S.; Li, R.C.	J. Pharm. Pharmacol., 1999; 51(2), 175-180.	https://www.ncbi.nlm.nih.gov/pubmed/10217316
23	Ginseng	Ginseng人參	Korean red ginseng				Anti-diabetic medications	Possible; korean red ginseng treatment maintained good glycemic control and improved regulation safely (韓國紅參可維持血糖控制並促進血糖有效控制)	a double-blind, randomized, crossover design in diabetes patients (糖尿病病患之雙盲隨機臨床試驗)	N	N	39	korean red ginseng preparation 6 g/day for 12 weeks as an adjunct to their usual anti-diabetic therapy (病患接受常規降血糖藥物再持續併用韓國紅參每日六克12週)	N	no convincing long-term clinical efficacy when administered as an adjunct to usual antidiabetic therapy (輔助降血糖藥12週促進血糖控制但常期效果未明)	Korean red ginseng (Panax ginseng) improves glucose and insulin regulation in well-controlled, type 2 diabetes: results of a randomized, double-blind, placebo-controlled study of efficacy and safety.	Vuksan V, Sung MK, Sievenpiper JL, Stavro PM, Jenkins AL, Di Buono M, Lee KS, Leiter LA, Nam KY, Arnason JT, Choi M, Naeem	Nutr Metab Cardiovasc Dis. 2008 Jan;18(1):46-56.	https://www.ncbi.nlm.nih.gov/pubmed/16860976
24	Ginseng	Ginseng人參				ginsenosides (Compound K) derived from ginseng radix	Metformin	Unevaluable; Significant improvements in plasma glucose and insulin levels (顯著改善血糖及胰島素濃度)	mice treated with 8-weeks Ginsenoside compound K 10 mg/kg, metformin at 150 mg/kg, or combination treatment (小鼠分三組分別餵食八週的人參皂苷K 10 mg/kg, metformin at 150 mg/kg, 或併用兩者)	N	Y	N	N	Ginsenoside compound K' effect was through its insulin-secreting action (人參皂苷K促進胰島素分泌)	Ginsenoside compound K and metformin are comparable with doses of 10 and 150 mg/kg (人參皂苷K10 mg/kg具有等同metformin 150 mg/kg降血糖作用)	Anti-diabetic effects of compound K versus metformin versus compound K-metformin combination therapy in diabetic db/db mice.	Yoon SH, Han EJ, Sung JH, Chung SH.	Biol Pharm Bull. 2007; 30(11):2196-200.	https://www.ncbi.nlm.nih.gov/pubmed/17978500
25	Ginseng	Ginseng人參	Korean red ginseng extract				Metformin	Unevaluable; metformin or ginseng alone or administered concomitantly for 5 weeks decreased the fasting blood glucose and HbA1c levels (併用能加成個別中西藥對血糖及HbA1c生化值調降之作用)	diabetic rats received metformin 50 mg/kg with or without single or multiple administration of Korean red ginseng extract (RGE, 2 g/kg/day, once or for 1 week).	N	Y	N	N	co-administration of RGE and metformin did not cause PK interactions or affect biochemical parameters (併用不改變藥物之動力學及糖代謝生化指標)	co-administrationesting that the effect was additive; need to titrate dose of each drug (併用會加成個別藥物之降血糖作用；建議可調降個別藥物劑量)	Effect of Red Ginseng Extract on the Pharmacokinetics and Efficacy of Metformin in Streptozotocin-Induced Diabetic Rats.	Nam SJ, Han YJ, Lee W, Kang B, Choi MK, Han YH, Song IS.	Pharmaceutics. 2018; 10(3)pii: E80.	https://www.ncbi.nlm.nih.gov/pubmed/29970815
26	Asian Ginseng	Asian Ginseng人參(亞洲)					Insulin	Possible; reduced fasting blood glucose (降低空腹血糖)	double-blind placebo-controlled study for 8 weeks with ginseng (100 or 200 mg) or placebo (雙盲隨機臨床試驗)	N	N	36	newly diagnosed non-insulin-dependent diabetes mellitus (NIDDM) patients(新診斷NIDDM病患)	unclear (未明)	Ginseng may be a useful therapeutic adjunct in the management of NIDDM.(人參可作為NIDDM輔助治療)	Ginseng therapy in non-insulin-dependent diabetic patients.	Sotaniemi EA(1), Haapakoski E, Rautio A.	Diabetes Care. 1995; 18(10):1373-5.	https://www.ncbi.nlm.nih.gov/pubmed/8721940
27	Ginseng, germanium-containing ginseng	Ginseng人參		Uncle Hsu's Korean ginseng			Furosemide	Likely; became refractory to diuretics while ingesting germanium-containing ginseng (服用人參製劑產生利尿劑作用拮抗情形)	Case report_ 63-year-old man with membranous glomerulonephritis( 個案報告)	N	N	1	patient treated with furosemide and cyclosporin, 10-12 tablets of a germanium-containing ginseng preparation about 10 days (病患接受利尿劑furosemide, cyclosporin於持續併用10-12錠人參製劑十日)	Germanium, an ingredient in many ginseng preparations and over-the-counter nutritional supplements, has been associated with chronic renal failure (人參中的鍺可能與腎衰竭有關)	one case report of a patient taking furosemide (Lasix®), ginseng was suspected of inducing diuresis resistance(人參可能降低利尿劑效果)	Ginseng-induced diuretic resistance	Becker BN, Greene J, Evanson J, Chidsey G, Stone WJ.	JAMA 1996; 276(8): 606-607.	https://www.ncbi.nlm.nih.gov/pubmed/8773630
28	Asia Ginseng	Asian Ginseng人參(亞洲)					Antihypertensives ag	Likely; reduce distolic but not systolic (降低舒張壓)	double-blind, placebo-controlled, parallel design (雙盲平行試驗)	N	N	64	type 2 diabetes patients with concomitant hypertension Ginseng extract or placebo at daily dose of 3g for 12 week (糖尿病病患合併有高血壓經服用亞洲人參每日3克12週)	vasodilatating effect (人參血管擴張效果)	monitoring blood pressure if concomitant for three month (併用3個月需監測血壓)	Effect of American ginseng (Panax quinquefolius L.) on arterial stiffness in subjects with type-2 diabetes and concomitant hypertension.	Mucalo I, Jovanovski E, Rahelić D, Božikov V, Romić Z, Vuksan V.	J Ethnopharmacol. 2013; 150(1):148-53.	https://www.ncbi.nlm.nih.gov/pubmed/23973636
29	Ginseng	Ginseng人參					nifedipine (Procardia®)	Likely; Ginseng increased serum levels of nifedipine (併用人參上升nifedipine血中濃度 32.6>>>50 ng/ml)	clinical trial in healthy volunteers (臨床試驗; 12 men and 10 women)	N	N	22	healthy volunteers treated by nifedipine 10 mg with or without ginseng 200mg/d 18 days (健康人服用 nifedipine 10 mg併用 200mg/d 18 days人參)	inhibition of CYP3A4 by ginseng	monitoring blood pressure if concomitant (併用需監測血壓)	An open trial of nifedipine-herb interactions Nifedipine with St Johns wort, Ginseng or Ginkgo biloba	Smith, M.; Lin, K.M.; Zheng, Y.P.	Clin. Pharmacol. Ther., 2001, 69, P86.	https://www.researchgate.net/publication/292241013_An_open_trial_of_nifedipine-herb_interactions_Nifedipine_with_St_john's_wort_ginseng_or_ginko_biloba
30	Ginseng	Ginseng人參					Phenelzine (Nardil®)	Possible; May result in manic-like symptoms, including mania, headache, tremors, and insomnia (可能導致狂躁症狀)	case report(個案報告)	N	N	1	A 42-year-old female patien suffering from depression was treated with phenelzine 45 mg/d. After taking Ginseng, the patient presented hypomaniacal symptoms (接受phenelzine治療的憂鬱症病人於服用人參後反而輕微狂躁症狀)	unclear (未明)	Symptoms of mania fully remitted within days upon discontinuation of ginseng and supportive treatment (長期過量單用人參或者併用其他藥物可能會造成狂躁情緒；立即停用人參可緩解)	Interaction of ginseng with phenelzine.	Jones BD, Runikis AM.	J Clin Psychopharmacol. 1987 Jun;7(3):201-2.	http://www.drug-interactions.eu/drug/index.php/ginseng-phenelzine/
31	Ginseng	Ginseng人參					Tobramycin	Unevaluable; stimulated the pro-inflammatory response and promoted the killing of P. aeruginosa (人參刺激免疫反應並提升殺死綠膿桿菌作用)	chronic lung infection by Pseudomonas aeruginosa treated with 300 μg/kg tobramycin with or without 100 mg/kg ginseng (動物肺臟經感染後接受抗生素 300 μg/kg tobramycin 比較是否併用人參 100 mg/kg對免疫反應與殺菌效果)	Y	N	N	N	levels of pro-inflammatory cytokines (IL-2, IL-4, IL-6, IL-12p70, IFN-γ, GM-CSF, TNF-α) were significantly increased with co-treatment of ginseng plus tobramycin in infected animals (給予受感染動物 tobramycin同時併用人參促進其發炎前驅激素分泌)	clinical evidence is not clear; Not recommend taken together (建議不要併用兩者 )	Co-administration of aqueous ginseng extract with tobramycin stimulates the pro-inflammatory response and promotes the killing of Pseudomonas aeruginosa in the lungs of infected rats	Alipour M, Omri A, Lui EM, Suntres ZE	Can J Physiol Pharmacol. 2013 Nov;91(11):935-40. doi: 10.1139/cjpp-2013-0073.Epub 2013 Jun 27	https://www.ncbi.nlm.nih.gov/pubmed/24117261
32	Ginkgo	Ginkgo銀杏葉	Ginkgo biloba	ginkgolide mixture BN 52063			Platelet activating factor	Possible; BN 52063 significantly inhibited PAF (400 ng)-induced platelet aggregation in platelet-rich plasma (銀杏BN 52063產品顯著抑制血小板凝集作用)	a double-blind, placebo-controlled, crossover study in 6 normal subjects (健康人參與雙盲安慰劑對照交叉試驗)	N	N	6	plasma responses to 400 ng PAF were examined 2 h after ingestion of 80 mg, 120 mg BN 52063 in healthy subjects (健康人服用 80 mg, 120 mg ginkgolide mixture BN 52063兩小時後檢測其血漿凝血反應)	Ginkgolide mixture may antagonize the effects of platelet-activating factor but not ADP-induced platelet aggregation (銀杏葉的成分會拮抗血小板活化因子但不改變ADP誘導的機制)	Not recommend taken together (建議不要併用兩者 )	Effect of a ginkgolide mixture (BN 52063) in antagonising skin and platelet responses to platelet activating factor in man.	Chung KF, Dent G, McCusker M, Guinot P, Page CP, Barnes PJ.	Lancet. 1987; 1(8527):248-51.	https://www.ncbi.nlm.nih.gov/pubmed/2880069
33	Ginkgo	Ginkgo銀杏葉	Ginkgo biloba			Ginkgolide	Warfarin	Unevaluable; GBE attenuated the anticoagulant action of warfarin. Bilobalide, a component of GBE that markedly induced hepatic CYPs (銀杏萃取降低warfarin凝血作用；其 Bilobalide顯著增加肝代謝酵素活性而促進warfarin代謝)	Mice received warfarin for the last 3 days of the 5-day GBE (up to 1000 mg/kg) or ginkgolide B (up to 140 mg/kg) to compare blood coagulation parameters (給予小鼠口服銀杏萃取GBE up to 1000 mg/kg or ginkgolide B up to 140 mg/kg)或其B成分五日後最後三日併用warfarin檢測其凝血或肝酵素CYP活性)	N	Y	N	N	GBE attenuates the anticoagulation action of warfarin via induction of hepatic CYPs by bilobalide (銀杏萃取降低warfarin凝血作用因其 Bilobalide顯著增加肝代謝酵素活性而促進warfarin代謝)	動物實驗顯示長期服用GBE後再接受warfarin治療會增加後者的代謝與作用；併用時要留意是否需調升warfarin劑量	Ginkgo biloba extract attenuates warfarin-mediated anticoagulation through induction of hepatic cytochrome P450 enzymes by bilobalide in mice.	Taki Y, Yokotani K, Yamada S, Shinozuka K, Kubota Y, Watanabe Y, Umegaki K.	Phytomedicine. 2012; 19(2):177-82.	https://www.ncbi.nlm.nih.gov/pubmed/21802929
34	Ginkgo	Ginkgo銀杏葉	Ginkgo biloba			Ginkgolide	Warfarin	Possible; Ginkgo biloba may have increased left parietal hemorrhage (PT16.9, PTT35.5) and contributed to an intracerebral hemorrhage. (併用銀杏葉可能與提升凝血原時間有關；導致腦內出血)	case report (個案)	N	N	1	A 78-year-old woman who had been taking warfarin for five years after coronary bypass surgery, then used a ginkgo product for two months (78歲女性因接受冠狀動脈繞道手術經使用warfarin超過五年後使用兩個月的銀杏產品)	Ginkgo inhibits platelet aggregation.(銀杏葉有抗血小板作用）	patients on warfarin therapy should be advised to avoid concurrent use of G. biloba (服用warfarin病人併用銀杏萃取時仍須小心)	Association of Ginkgo biloba with intracerebral hemorrhage	Matthews MK Jr.	Neurology. 1998; 50(6):1933-4	http://n.neurology.org/content/50/6/1933.1
35	Ginkgo	Ginkgo銀杏葉					Warfarin	Possible; INR not altered (併用未改變INR值)	a randomised crossover study (隨機交叉試驗)	N	N	24	outpatients on chronic warfarin treatment combined oral ingestion of G. biloba extract 100 mg daily for 4 weeks did not alter the INR, and the mean dosage of warfarin did not change (每日口服100 mg銀杏四週不影響原本長期服用warfarin所需劑量)	N	G. biloba extract may affect the clinical outcome when combined with warfarin and concerning combination is needed (對健康人無影響但銀杏萃取可能改變warfarin對病人臨床成效；併用時仍須小心)	[Effect of Coenzyme Q10 and Ginkgo biloba on warfarin dosage in patients on long-term warfarin treatment. A randomized, double-blind, placebo controlled cross-over trial]. [Article in Danish]	Engelsen, J.; Nielsen, J. D.; Hansen, K. F.	Ugeskr Laeger, 2003, 165(18), 1868-1871.	https://www.ncbi.nlm.nih.gov/pubmed/12772396
36	Ginkgo	Ginkgo銀杏葉					Warfarin	Likely; not significant effect on warfarin pharmacokinetics and pharmacodynamics (併用未改變warfarin 動力學參數)	open label, three-way crossover randomized study in 12 healthy male subjects (健康男性隨機交叉試驗)	N	N	12	subject received a single 25 mg warfarin alone or after 7 days pretreatment with recommended doses of ginkgo from herbal medicine products of known quality (受試者單一服用 25 mg warfarin 或先服用適當劑量之標準化銀杏產品7 日再併服)	N	G. biloba extract may affect the clinical outcome when combined with warfarin and concerning combination is needed (對健康人無影響但銀杏萃取可能改變warfarin對病人臨床成效；併用時仍須小心)	Effect of ginkgo and ginger on the pharmacokinetics and pharmacodynamics of warfarin in healthy subjects.	Jiang, X.; Williams, K. M.; Liauw, W. S.; Ammit, A. J.; Roufogalis, B. D.; Duke, C. C.; Day, R. O.; McLachlan, A. J.	Br. J. Clin. Pharmacol., 2005, 59(4), 425-432.	https://www.ncbi.nlm.nih.gov/pubmed/15801937
37	Ginkgo biloba	Ginkgo銀杏葉					Aspirin/ibuprofen	Possible; the patient suffered a cerebral hemorrhage, resulting in coma and death ( 病人腦出血致昏迷死亡)	case report (個案)	N	N	1	a 70-year-old male taking aspirin 325 mg daily for 3 years. After a regimen of 40 mg twice daily of G. biloba was begun, taking ibuprofen 600 mg daily 4 weeks for osteoarthritis (七十歲男性持續三年每日服用aspirin 325 mg；於每日早晚併用G. biloba 40 mg又因關節炎每日再服用四週 ibuprofen 600 mg)	possibly due to the antiplatelet effects of the ginkgolide B component (可能與銀杏成分B的抗血小板作用有關)	Concurrent use of G. biloba with anticoagulants, aspirin and ibuprofen should be avoided (有服用aspirin and ibuprofen則應避免併用銀杏)	Spontaneous hyphema associated with ingestion of Ginkgo biloba extract.	Rosenblatt, M., Mindel, J.,	New England Journal of Medicine 1997; 336(15), 1108.	https://www.ncbi.nlm.nih.gov/pubmed/9091822
38	Ginkgo	Ginkgo銀杏葉					Ticlopidine	Possible; no significant different in platelet aggregation, adverse events and PK of ticlopidine between two groups (併用銀杏對血小板凝集、 ticlopidine藥物動力參數或其不良事件無顯著差異)	An open-label, randomized, 2-period, 2-treatment, 2-sequence, single-dose crossover study in healthy Korean male volunteers (健康受試者參與隨機單一劑量交叉試驗)	N	N	24	volunteers assigned to ticlopidine 250 mg alone or with Ginkgo biloba extract 80 mg (健康受試者單獨服用 ticlopidine 250 mg或與80 mg銀杏葉萃取併用)	N	addition of a single dose of Ginkgo biloba extract did not prolong the bleeding time and was not associated with additional antiplatelet effects in health men (單一劑量併用銀杏對健康人不會增加西藥風險)	Influence of Ginkgo biloba extract on the pharmacodynamic effects and pharmacokinetic properties of ticlopidine: an open-label, randomized, two-period, two-treatment, two-sequence, single-dose crossover study in healthy Korean male volunteers.	Kim BH, Kim KP, Lim KS, Kim JR, Yoon SH, Cho JY, Lee YO, Lee KH, Jang IJ, Shin SG, Yu KS.	Clin Ther. 2010; 32(2):380-90.	https://www.ncbi.nlm.nih.gov/pubmed/20206795
39	Ginkgo	Ginkgo銀杏葉	Ginkgo biloba				Antipyrine	Possible; hepatic microsomal drug oxidation, indicated by half-life of antipyrine, was not affected by Ginkgo biloba extract (銀杏葉不影響肝臟代謝酵素活性)	healthy volunteers by randomized controlled trial (健康受試者參與隨機對照試驗)	N	N	24	healthy volunteers treated 400 mg/day Ginkgo for 13 days (健康受試者13天連續服用400 mg/day的銀杏葉)	GBE has no effect on the hepatic microsomal drug oxidation system (服用銀杏 400 mg 持續兩週不會影響肝臟代謝活性)	GBE did not act like phenytoin (服用銀杏 400 mg 持續兩週不會產生類似 phenytoin之交互作用)	Effect of Ginkgo biloba extract on microsomal enzyme induction	Duche JC, Barre J, Guinot P, Duchier J, Cournot A, Tillement JP.	Int. J. Clin. Pharmacol. Res. 1989; 9(3):165-8.	https://www.ncbi.nlm.nih.gov/pubmed/2744909
40	Ginkgo	Ginkgo銀杏葉	Ginkgo biloba			24% flavone glycosides and 6% terpene lactones	Caffeine	Likely; post-intake 240 mg/d ginkgo on paraxanthine/caffeine serum ratios showed moderate changes in specific individuals, but no statistically significant differences in mean values (每日補充240 mg/d中度改變咖啡因代謝但無顯著差異)	healthy volunteers randomly assigned (健康受試者隨機分配試驗)	N	N	12	caffeine (oral dose 100 mg) administered before and at the end of 28 days ginkgo intake followed by a 30-day washout period. CYP1A2 activity was determined by paraxanthine/caffeine serum ratios (100 mg咖啡因經口服28日銀杏60 mgx4/d後的代謝比值變化)	N	No affect on CYP1A2 activity (caffeine as probe) by 28 days ginkgo intake, but drug metabolized by CY3A4/2E1, 2D6 should be strongly discouraged in the elderly (咖啡因 100 mg經口服28日銀杏60 mgx4/d後的代謝比值無影響；但老人應避免併服經CY3A4/2E1, 2D6代謝西藥)	Clinical assessment of effects of botanical supplementation on cytochrome P450 phenotypes in the elderly: St John's wort, garlic oil, Panax ginseng and Ginkgo biloba.	Gurley, B. J.; Gardner, S. F.; Hubbard, M. A.; Williams, D. K.; Gentry, W. B.; Cui, Y.; Ang, C. Y.	Drugs Aging, 2005; 22(6):525-539.	https://www.ncbi.nlm.nih.gov/pubmed/15974642
41	Ginkgo	Ginkgo銀杏葉	Ginkgo biloba				Valproate	Possible; Generalized tonic-clonic seizures (可能發生大癲癇)	case report (個案)	N	N	1	78-year-old man treated with 1200 mg of valproate sodium daily coadmnistered G. biloba regimen of 120 mg daily (78歲男性每日接受1200 mg valproate 時併用120 mg銀杏)	Contaminants of leaf/seed which may contain neurotoxins (銀杏葉/籽可能含神經毒素)	Be ware of product quality (須留意銀杏產品品質)	Ginkgo biloba precipitating epileptic seizures.	Granger AS.	Age Ageing. 2001;30(6):523-5.	https://www.ncbi.nlm.nih.gov/pubmed/11742783
42	Ginkgo	Ginkgo銀杏葉					Valproate	Possible; status epilepticus (可能發生癲癇重積狀態)	case report (個案)	N	N	1	84-year-old woman on a regimen of 1600 mg valproate sodium daily. After began taking 120 mg of Ginkgo daily (84歲女性每日接受1600 mg valproate 時併用120 mg銀杏經12日)	Contaminants of leaf/seed which may contain neurotoxins (銀杏葉/籽可能含神經毒素)	Be ware of product quality (須留意銀杏產品品質)	Ginkgo biloba precipitating epileptic seizures.	Granger AS.	Age Ageing. 2001;30(6):523-5.	https://www.ncbi.nlm.nih.gov/pubmed/11742783
43	Ginkgo	Ginkgo銀杏葉					SSRI	Likely; no statistical significant difference in SSRI antidepressant induced sexual dysfunction weeks 8 after co-medication with Ginkgo biloba (n=19) vs. placebo (n=18) (併用銀杏八週無顯著改善憂鬱症藥物引起的性功能障礙)	a randomized placebo-controlled, double-blind study (隨機對照雙盲試驗)	N	N	37	Patients administered with SSRI antidepressant with or without Ginkgo biloba for 2 months (病患服用兩個月的SSRI抗憂鬱劑或與併用銀杏)	N	no efficacy for improving sexdual dysfunction (對性功能障礙無改善功效)	A placebo‐controlled, double‐blind trial of Ginkgo biloba for antidepressant‐induced sexual dysfunction	Kang BJ, Lee SJ, Kim MD, Cho MJ.	Hum Psychopharmacol. 2002 Aug;17(6):279-84.	https://www.ncbi.nlm.nih.gov/pubmed/12404672
44	Ginkgo	Ginkgo銀杏葉	Ginkgo biloba				antidepressant drugs	Possible; gender-orientated questionnaire, Hamilton anxiety and depression ratings were made and no statistically significant differences in symptoms or side-effects (不論男女經評量調查結果顯示併用銀杏無顯著改善憂鬱症藥物引起的性功能障礙)	A triple-blind (investigator, patient, statistician), randomized, placebo-controlled (隨機對照三盲試驗)	N	N	24	patients with sexual impairment due to antidepressant drugs with or without Ginkgo biloba 240 mg daily for 12 weeks of treatment. (憂鬱症男女服用抗憂鬱劑且診斷有性功能障礙病人，給予銀杏每日服用240mg12週)	N	no efficacy for improving depression symptom or sexdual dysfunction (對憂鬱症狀或性功能障礙無改善功效)	Triple-blind, placebo-controlled trial of Ginkgo biloba in sexual dysfunction due to antidepressant drugs.	Wheatley D.	Hum Psychopharmacol. 2004;19(8):545-8.	https://www.ncbi.nlm.nih.gov/pubmed/15378664
45	Ginkgo	Ginkgo銀杏葉					Lopinavir/ ritonavir	Likely; no change in the exposure of lopinavir, likely due to ritonavir's potent inhibition of CYP3A4 (併服銀杏不影響lopinavir濃度可能與 ritonavir具CYP3A4抑制作用有關)	open-label study evaluated in healthy subjects (健康受試者)	N	N	14	2 weeks of standardized 120 mg twice daily GBE administration coadministered with the steady-state lopinavir and ritonavir as P-gp substrates (健康人併服240 mg/d銀杏以及屬P-gp代謝藥物 lopinavir and ritonavir 兩週)	N	GBE unlikely reduced the exposure of ritonavir-boosted protease inhibitor, while concentrations of unboosted protease inhibitors may be affected. (銀杏不至於降低抗 ritonavir-boosted蛋白酶抑制劑作用；但仍可能影響單獨服用蛋白酶抑制劑的作用)	Effect of Ginkgo biloba extract on lopinavir, midazolam and fexofenadine pharmacokinetics in healthy subjects.	Robertson, S. M.; Davey, R. T.; Voell, J.; Formentini, E.; Alfaro, R. M.; Penzak, S. R.	Curr. Med. Res. Opin., 2008, 24(2), 591-599.	https://www.ncbi.nlm.nih.gov/pubmed/18205997
46	Ginkgo	Ginkgo銀杏葉					Fexofenadine	Likely; not significantly affected pharmacokinetics of fexofenadine (無顯著影響fexofenadine藥物動力學)	open-label study evaluated in healthy subjects (健康受試者)	N	N	14	single oral doses of 120 mg fexofenadine was administered prior to and after 4 weeks of GBE (健康人併服240 mg/d銀杏後再給予單一口服120 mg劑量的 fexofenadine)	N	gingko may inhibit intestinal P-gp and thus increase the AUC of fexofenadine, a P-gp substrate (銀杏可能抑制藥物被腸內 P-gp所代謝以致fexofenadine 體內總量可能上升)	Effect of Ginkgo biloba extract on lopinavir, midazolam and fexofenadine pharmacokinetics in healthy subjects.	Robertson, S. M.; Davey, R. T.; Voell, J.; Formentini, E.; Alfaro, R. M.; Penzak, S. R.	Curr. Med. Res. Opin., 2008, 24(2), 591-599.	https://www.ncbi.nlm.nih.gov/pubmed/18205997
47	Ginkgo	Ginkgo銀杏葉					Midazolam	Likely; decreased the AUC and Cmax of 8 mg midazolam (a CYP3A4 substrate) by 34% and 31% significantly	open-label study evaluated in healthy subjects (健康受試者)	N	N	14	single oral doses of 8 mg midazolam was administered prior to and after 4 weeks of GBE (健康人併服240 mg/d銀杏後再給予單一口服劑量的 midazolam)	GEB may induce CYP3A4 and thus enhance the metabolism of midazolam, a CYP3A4 substrate (銀杏可能誘導CYP3A4以致促進midazolam代謝)	Not recommend taken together or titrate up midazolam dose if needed (建議不要併用兩者或單一劑量併用時應留意midazolam劑量須調升)	Effect of Ginkgo biloba extract on lopinavir, midazolam and fexofenadine pharmacokinetics in healthy subjects.	Robertson, S. M.; Davey, R. T.; Voell, J.; Formentini, E.; Alfaro, R. M.; Penzak, S. R.	Curr. Med. Res. Opin., 2008, 24(2), 591-599.	https://www.ncbi.nlm.nih.gov/pubmed/18205997
48	Ginkgo biloba	Ginkgo銀杏葉					Midazolam	Possible; GBE intake increased AUC for midazolam by 25% and decreased clearance by 26% significantly (28天持續服用銀杏360 mg/d增加25%midazolam體內量因為其清除率降低26%)	male healthy volunteers (健康男性受試者)	N	N	10	oral administration of 360 mg/d GBE for 28 days with or without CYP3A4 probe (midazolam, 8 mg) (360 mg/d) (分析midazolam濃度並觀察連續28日給予銀杏達每日360 mg的影響)	GEB may induce CYP3A4 and thus enhance the metabolism of midazolam, a CYP3A4 substrate (銀杏可能誘導CYP3A4以致促進midazolam代謝)	long-term combination of GBE up to 360 mg/d for 28 days, and drugs should be cautious, especially in elderly patients (建議不要長期併用兩者，尤其是老人)	Effects of Ginkgo biloba extract on pharmacokinetics and pharmacodynamics of tolbutamide and midazolam in healthy volunteers.	Uchida S, Yamada H, Li XD, Maruyama S, Ohmori Y, Oki T, Watanabe H, Umegaki K, Ohashi K, Yamada S.	J Clin Pharmacol. 2006; 46(11):1290-8.	https://www.ncbi.nlm.nih.gov/pubmed/17050793
49	Ginkgo biloba	Ginkgo銀杏葉					Alprazolam	Likely; a slight decrease in alprazolam AUC by 17% with no change in half-life (alprazolam總量下降17%但不影響其半衰期)	normal volunteers (健康受試者)	N	N	12	Pharmacokinetics of alprazolam were determined before and after co-administered orally following GB (120 mg twice daily) for 14 days (比較分析alprazolam血漿濃度在併用前及併用120 mg GB twice daily兩週後的變化)	N	lack of hepatic CYP3A4 induction by 120 mg GB (每日120 mg 銀杏無顯著誘導健康人CYP3A4活性作用)	Multiple-dose administration of Ginkgo biloba did not affect cytochrome P-450 2D6 or 3A4 activity in normal volunteers.	Markowitz, J.S., Donovan, J.L., Lindsay DeVane, C., Sipkes, L., Chavin, K.D.,	Journal of Clinical Psychopharmacology 2003a; 23 (6), 576–581.	https://www.ncbi.nlm.nih.gov/pubmed/14624188
50	Ginkgo biloba	Ginkgo銀杏葉					Dextromethorphan	Likely; No clinical interactions were observed.(沒有顯著交互作用)	normal volunteers (n = 12) the influence of standardized Ginkgo biloba	N	N	12	Pharmacokinetics of dextromethorphan were determined before and after co-administered orally following GB (120 mg twice daily) for 14 days (比較分析dextromethorphan血漿濃度在併用前及併用120 mg GB twice daily兩週後的變化)	N	lack of hepatic CYP2D6 induction by 120 mg GB (每日120 mg 銀杏無顯著誘導健康人CYP2D6活性作用)	Multiple-dose administration of Ginkgo biloba did not affect cytochrome P-450 2D6 or 3A4 activity in normal volunteers.	Markowitz, J.S., Donovan, J.L., Lindsay DeVane, C., Sipkes, L., Chavin, K.D.,	Journal of Clinical Psychopharmacology 2003; 23 (6):576–581.	https://www.ncbi.nlm.nih.gov/pubmed/14624188
51	Ginkgo	Ginkgo銀杏葉					Haloperidol	Possible; Ginkgo may enhance the efficiency of the classic antipsychotic haloperidol, especially on their positive symptoms (併用銀杏萃取併用可能有利於思覺失調病情改善且顯著改善正向症狀)	clinical trials in patients (病人臨床試驗)	N	N	109	Patients treated by haloperidol 0.25 mg/kg per day with 360 mg/day EGb vs. placebo (評估是否併用 360 mg/day銀杏萃取對接受 0.25 mg/kg per day haloperidol治療的思覺失調症病人正負向症狀影響)	unknown	Ginkgo may enhance the efficiency of the classic antipsychotic haloperidol (併用可能有利於思覺失調病情改善)	Extract of Ginkgo biloba added to haloperidol was effective for positive symptoms in refractory schizophrenia.	Knable MB.	Evid Based Ment Health. 2002;5(3):90.	https://www.ncbi.nlm.nih.gov/pubmed/12180457
52	Ginkgo	Ginkgo銀杏葉	Ginkgo biloba				Haloperidol	Likely; reponse rate in group of EGb plus haloperidol or those receiving placebo plus haloperidol was 57.1% vs. 37.7% (有併用銀杏萃取其病情改善為比例較高 57.1% vs. 37.7%)	clinical trials in patients (病人臨床試驗 n= 56 vs. 53)	N	N	109	the effectiveness of 0.25 mg/kg/d haloperidol when co-administered with 360 mg/d G. biloba was measured using Positive or Negative Symptoms Scale (評估是否併用 360 mg/d銀杏萃取對接受 0.25 mg/kg/d haloperidol治療的思覺失調症病人其正負向症狀之影響)	N	EGb treatment may enhance the effectiveness of antipsychotic drugs and reduce their extrapyramidal side effects (併用可能有利於思覺失調病情改善也能改善椎體外副作用)	A double-blind, placebo-controlled trial of extract of Ginkgo biloba added to haloperidol in treatment-resistant patients with schizophrenia.	Zhang, X.Y., Zhou, D.F., Zhang, P.Y., Wu, G.Y., Su, J.M., Cao, L.Y.	Clin Psychiatry. 2001; 62(11):878-83.	https://www.ncbi.nlm.nih.gov/pubmed/11775047
53	Ginkgo	Ginkgo銀杏葉	Ginkgo biloba				Haloperidol	Likely; Ginkgo may enhance the efficiency of the classic antipsychotic haloperidol, especially on their positive symptoms (併用銀杏萃取併用可能有利於思覺失調病情改善且顯著改善正向症狀)	clinical trials in patients (病人臨床試驗 n= 43 vs. 39)	N	N	82	patients with chronic refractory schizophrenia were treated with haloperidol plus extract of ginkgo biloba vs. haloperidol plus placebo (評估是否併用銀杏萃取對接受 haloperidol治療的思覺失調症病人正負向症狀影響)	EGb may work through an antioxidant effect that is involved in the therapeutic mechanism in patients with chronic refractory schizophrenia (銀杏萃取能經由促進抗氧化功效並參與思覺失調症治療機制)	Ginkgo may enhance the efficiency of the classic antipsychotic haloperidol (併用可能有利於思覺失調病情改善)	The effect of extract of Ginkgo biloba added to haloperidol on superoxide dismutase in inpatients with chronic schizophrenia.	Zhang XY, Zhou DF, Su JM, Zhang PY.	J Clin Psychopharmacol. 2001; 21(1):85-8.	https://www.ncbi.nlm.nih.gov/pubmed/11199954
54	Ginkgo	Ginkgo銀杏葉	Ginkgo biloba				Trazadone	Possible; Patient with Alzheimer's disease who developed coma a few days after starting low dose trazodone associated with ginkgo. (併用銀杏可能引起昏迷)	case report(個案)	N	N	1	The patient was switched from bromezepam to trazadone 20 mg twice daily with the addition of G. biloba 80 mg daily. (病人同時併用trazadone和銀杏)	Ginkgo increase GABAergic activity and increase CYP3A4 function and mCPP production. (銀杏和benzadiazepine結合位結合)	Administration of flumazenil can decrease GABAergic activity and might can reverse patient condition. (併用)	Coma in a patient with Alzheimer's disease taking low dose trazodone and Gingko biloba.	Galluzzi, S., Zanetti, O., Binetti, G., Trabucchi, M., Frisoni, G.B., 2000.	Journal of Neurology, Neurosurgery and Psychiatry 68 (5), 679–680.	https://www.ncbi.nlm.nih.gov/pubmed/10836866
55	Ginkgo	Ginkgo銀杏葉	Ginkgo biloba				Ibuprofen	Unevaluable; The patient suffered a cerebral hemorrhage, resulting in coma and death. ( 病人腦出血致昏迷死亡)	case report(個案)	N	N	1	a 71-year-old male patient taking 40 mg of G. biloba extract daily for over 2 years for dizziness. Four weeks prior to his death, he had taken ibuprofen (600mg daily) for osteoarthritis. (七十一歲男性持續於每日服用G. biloba 40 mg又因關節炎每日再服用四週 ibuprofen 600 mg)	possibly due to the antiplatelet effects of the ginkgolide B component (可能與銀杏成分B的抗血小板作用有關)	possible; Concurrent use of G. biloba with anticoagulants, aspirin and ibuprofen should be avoided. (有服用aspirin and ibuprofen則應避免併用銀杏)	Fatal intracerebral mass bleeding associated with Ginkgo biloba and ibuprofen.	Meisel, C., Johne, A., Roots, I.,	Atherosclerosis 2003; 167 (2), 367.	https://www.ncbi.nlm.nih.gov/pubmed/12818420
56	Ginkgo	Ginkgo銀杏葉	Ginkgo biloba				Nifedipine	Likely; Increase in mean plasma level of Nifedipine (增加血中Nifedipine濃度)	Case series n=22 Healthy subjects(22位個案)	N	N	22	Comparing to the mean of NF (Nifedipine) plasma concentration of NF alone, NF+GS(ginseng) and NF+GK (ginko) increased 29% and 53% respectively. (與單獨Nifedipine血漿濃度相比，Nifedipine + 銀杏增加53％)	This data is the first report of GS and GK's inhibition of CYP3A4. (GS和GK可能會抑制CYP3A4)	possible; Caution must be exercised when these herbs are combined with medications that are CYP3A4 substrates. (應避免併服經CYP3A4代謝西藥)	An open trial of nifedipine-herb interactions Nifedipine with St Johns wort, Ginseng or Ginkgo biloba	Smith, M.; Lin, K.M.; Zheng, Y.P.	Clin. Pharmacol. Ther., 2001, 69, P86.	https://www.researchgate.net/publication/292241013
57	Ginkgo	Ginkgo銀杏葉					Nifedipine	Unevaluable; The maximal plasma NFP concentration, the area under the concentration-time curve and absolute bioavailability after oral NFP (5 mg/kg) were significantly increased by simultaneous oral treatment with GBE. (併用會增加nifedipine的藥物動力學)	Simultaneous oral GBE (20 mg/kg) did not affect the pharmacokinetics after intravenous NFP (2.5 mg/kg) in rats, but on the oral NFP (5 mg/kg) was determined. (給予大鼠口服銀杏GBE 20 mg/kg並靜脈注射NFP 2.5mg/kg後不影響藥物動力學，但口服NFP 5mg/kg有影響)	N	Y	N	N	concomitant oral use of GBE appeared to reduce the first-pass metabolism of orally administered NFP, by inhibiting CYP3A, possibly but not P-gp, in rats. (銀杏可能抑制CYP3A4以致減少nifedipine代謝)	No recommeded to oral intake together(建議不要口服併用兩者)	Studies on interactions between functional foods or dietary supplements and medicines. III. Effects of ginkgo biloba leaf extract on the pharmacokinetics of nifedipine in rats.	Yoshioka, M.; Ohnishi, N.; Sone, N.; Egami, S.; Takara, K.; Yokoyama, T.; Kuroda, K.	Biol. Pharm. Bull., 2004, 27(12), 2042-2045.	https://www.ncbi.nlm.nih.gov/pubmed/15577230
58	Ginkgo	Ginkgo銀杏葉					Nifedipine	Likely; The maximal plasma NFP concentrations were doubled by Ginkgo. Oral NFP with GBE had more severe and longer-lasting headaches and also increased heart rate over GBE alone. (併用會增加nifedipine的血中濃度，且會使頭痛加劇、心跳加速)	Pharmacokinetics and pharmacodynamics study in 8 healthy male volunteers(健康男性受試者)	N	N	8	The control studies were given NFP 10 mg, while in GBE co-administered studies were given NFP 10 mg and two capsules containing GBE (a total GBE dose of 240 mg; general daily dose in human) (同時給予nifedipine 10mg及銀杏 240mg)	increased Tmax of nifedipine (增加達nifedipine最大濃度所須時間)	It is recommended that GBE and NFP should not be simultaneously ingested as much as possible, and careful monitoring is needed when administering NFP concommitantly with GBE to humans. (建議不要併用兩者，若必要併用時注意監測)	Studies on interactions between functional foods or dietary supplements and medicines. IV. Effects of ginkgo biloba leaf extract on the pharmacokinetics and pharmacodynamics of nifedipine in healthy volunteers.	Yoshioka M, Ohnishi N, Koishi T, Obata Y, Nakagawa M, Matsumoto T, Tagagi K, Takara K, Ohkuni T, Yokoyama T, Kuroda K.	Biol Pharm Bull. 2004; 27(12):2006-9.	https://www.ncbi.nlm.nih.gov/pubmed/15577221
59	Ginkgo	Ginkgo銀杏葉	Ginkgo biloba				Omeprazole	Likely; No significant changes in the AUC ratios of omeprazole to its sulfone were observed. A significant decrease in the AUC ratio of omeprazole to 5-hydroxyomeprazole AUC by 67.5% (併用銀杏無顯著影響omeprazole的血中濃度，但會顯著減少5-hydroxyomeprazole的血中濃度)	controlled trial (病人臨床試驗 )	N	N	18	Patients were administered omeprazole 40 mg a day prior to and 1 day following a regimen of 140 mg G. biloba extract twice daily for 12 consecutive days(併服280 mg/d銀杏萃取後再給140 mg劑量的 omeprazole)	Co-administration of G. biloba with omeprazole or other CYP2C19 substrates may significantly reduce their effect (銀杏可能誘導CYP2C19以致促進omeprazole 代謝)	Cautions should be taken when patients concomitantly take ginkgo and drugs that are mainly eliminated by CYP2C19.(應避免併服經CY2C19代謝西藥)	Pharmacogenetics and herb–drug interactions: experience with Ginkgo biloba and omeprazole.	Yin, O.Q., Tomlinson, B., Waye, M.M., Chow, A.H., Chow, M.S.,	Pharmacogenetics 2004; 14 (12), 841–850.	https://www.ncbi.nlm.nih.gov/pubmed/15608563
60	Ginkgo	Ginkgo銀杏葉					Diazepam	Possible; treatment of gingko 120 mg bid for 28 days did not alter the pharmacokinetics of diazepam, another substrate of CYP2C19. The two drugs were well tolerated, and no drug-related serious adverse events were reported. (併用銀杏無顯著影響diazepam的血中濃度)	Pharmacokinetics study in healthy volunteers(健康受試者)	N	N	12	The pharmacokinetic parameters of diazepam and N-demethyldiazepam were compared after oral administration of diazepam (10 mg) in the absence or presence of oral GBE (120 mg bid, for 28 days) (併服240 mg/d銀杏萃取後再給10 mg劑量的 diazepam )	N; The 90% confidence intervals (CIs) of the ratios of mean pharmacokinetic parameters of diazepam presence and absence of GBE were well within the 80-125% bioequivalence range, indicating no pharmacokinetic interaction. (沒有藥物動力學交互作用)	no pharmacokinetic interaction (無藥物動力學影響)	Effects of Ginkgo biloba extracts on diazepam metabolism: a pharmacokinetic study in healthy Chinese male subjects.	Zuo, X. C.; Zhang, B. K.; Jia, S. J.; Liu, S. K.; Zhou, L. Y.; Li, J.; Zhang, J.; Dai, L. L.; Chen, B. M.; Yang, G. P.; Yuan, H.	Eur. J. Clin. Pharmacol., 2010, 66(5), 503-509.	https://www.ncbi.nlm.nih.gov/pubmed/20186406
61	Ginkgo	Ginkgo銀杏葉					Bupropion	Possible; No clinical interactions were observed in administration of bupropion (150 mg) alone and during treatment with G. biloba 240 mg/d (two 60-mg capsules taken twice daily) (沒有顯著的交互作用)	healthy male volunteers(健康男性受試者)	N	N	14	Serial blood samples were obtained over 72 h after each bupropion dose, and used to derive pharmacokinetic parameters of bupropion and its CYP2B6-catalysed metabolite, hydroxybupropion. (服用銀杏再給予bupropion後72小時，分析血中濃度)	N; oral intake of ginkgo does not affect the activities of CYP2B6 on bupropion used as the probe substrates (口服銀杏不會影響bupropion)	no bupropion dose adjustments appear warranted when the drug is administered orally with G. biloba extract, due to the lack of significant change observed in AUC for either bupropion or hydroxybupropion. (當bupropion與銀杏併用時不需調整劑量)	Effects of Ginkgo biloba extract on the pharmacokinetics of bupropion in healthy volunteers.	Lei HP, Ji W, Lin J, Chen H, Tan ZR, Hu DL, Liu LJ, Zhou HH.	Br J Clin Pharmacol. 2009; 68(2):201-6.	https://www.ncbi.nlm.nih.gov/pubmed/19694739
62	Ginkgo	Ginkgo銀杏葉					Tolbutamide	Possible; The AUC0-infinity for tolbutamide after GBE intake was slightly but significantly (16%) lower than that before GBE intake. Concomitantly, GBE tended to attenuate AUC0-2 of blood glucose-lowering effect of tolbutamide. (併用銀杏顯著減少tolbutamide的血中濃度)	a randomized, double-blind, 2-way crossover study in 10 male healthy volunteers (隨機對照雙盲試驗)	N	N	10	repeated oral administration of Ginkgo biloba extract (GBE) on CYP2C9 probe (tolbutamide, 125 mg) before and after GBE intake (360 mg/d) for 28 days, and they received 75 g glucose after the dosing of tolbutamide. (併服360 mg/d銀杏萃取後再給125 mg劑量的 tolbutamide， 分析血中濃度及血糖值)	CYP2C9 induced by GBE 360 mg/d (銀杏可能會誘導CYP2C9)	combination of GBE and drugs should be cautious in terms of the potential interactions, especially in elderly patients or patients treated with drugs exerting relatively narrow therapeutic windows (須謹慎併用，尤其是年老病人)	Effects of Ginkgo biloba extract on pharmacokinetics and pharmacodynamics of tolbutamide and midazolam in healthy volunteers.	Uchida S, Yamada H, Li XD, Maruyama S, Ohmori Y, Oki T, Watanabe H, Umegaki K, Ohashi K, Yamada S.	J Clin Pharmacol. 2006 Nov;46(11):1290-8.	https://www.ncbi.nlm.nih.gov/pubmed/17050793
63	Ginkgo	Ginkgo銀杏葉					Flurbiprofen	Possible; content analysis of the ginkgo preparation is insufficient to cause CYP2C9 inhibition in vivo (併用銀杏不會引起CYP2C9的抑制作用)	Randomized, double blind, 2-way crossover study in 11 healthy volunteers to assess the effect of Ginkgo biloba on the activity of CYP2C9. (隨機對照雙盲試驗)	N	N	11	single 100-mg doses of flurbiprofen, a probe substrate for CYP2C9 with or without a standardized G biloba leaf preparation (Ginkgold, 3 doses of 120 mg) or matching placebo. (健康人併服360 mg/d銀杏後再給予100mg 的 flurbiprofen)	N	60-mg Ginkgold tablet contained 6.6 mug of amentoflavone and 61.2 microg of quercetin, were apparently too low to inhibit CYP2C9 function in vivo. (銀杏錠含6.6 mug of amentoflavone and 61.2 microg of quercetin不足以抑制CYP2C9)	Ginkgo biloba does not alter clearance of flurbiprofen, a cytochrome P450-2C9 substrate.	Greenblatt, D. J.; von Moltke, L. L.; Luo, Y.; Perloff, E. S.; Horan, K. A.; Bruce, A.; Reynolds, R. C.; Harmatz, J. S.; Avula, B.; Khan, I. A.; Goldman, P.	J. Clin. Pharmacol., 2006, 46(2), 214-221.	https://www.ncbi.nlm.nih.gov/pubmed/16432273
64	Ginkgo	Ginkgo銀杏葉					Diclofenac	Likely; no interactions between Ginkgo biloba extract and CYP2C9 probe substrates were observed in vivo as evidenced by the lack of effect on the steady-state pharmacokinetics of diclofenac (不會顯著影響CYP2C9代謝西藥)	Two open-label, crossover pharmacokinetic studies in healthy subjects. (臨床試驗健康受試者)	N	N	12	Diclofenac potassium 50 mg was administered twice daily for 14 days. Ginkgo extract tablets, 120 mg twice daily, were given concurrently on days 8-15 (給予100mg 的 Diclofenac併服用240 mg/d銀杏 )	N	Combination uses for two weeks with 240 mg GBE did not change diclofenac total body amount (持續併用兩週 240 mg/day GBE 可能不會影響健康人diclofenac 血中總量；需再留意對病人作用的差異)	Ginkgo biloba: evaluation of CYP2C9 drug interactions in vitro and in vivo.	Mohutsky, M. A.; Anderson, G. D.; Miller, J. W.; Elmer, G. W.	Am. J. Ther., 2006, 13(1), 24-31.	https://www.ncbi.nlm.nih.gov/pubmed/16428919
65	Ginkgo	Ginkgo銀杏葉					Tolbutamide	Likely; no interactions between Ginkgo and CYP2C9 probe substrates were observed in vivo as evidenced by the lack of effect on the urinary metabolic ratio of tolbutamide. (不會顯著影響CYP2C9代謝西藥)	Two open-label, crossover pharmacokinetic studies in healthy subjects. (臨床試驗健康受試者)	N	N	6	Participants received a single 500 mg dose of tolbutamide orally. Ginkgo biloba treatment phase of the study consisting of 120 mg Ginkgo biloba extract twice daily for 3 days. (給予1000mg 的 tolbutamide，併服用240 mg/d銀杏 )	N	Combination uses for 3 days with 120 mg GBE did not increased 500 mg tolbutamide total body amount (併用 120 mg/day GBE三日極可能不會影響健康人tolbutamide血中總量；需再留意對糖尿病人作用的差異)	Ginkgo biloba: evaluation of CYP2C9 drug interactions in vitro and in vivo.	Mohutsky, M. A.; Anderson, G. D.; Miller, J. W.; Elmer, G. W.	Am. J. Ther., 2006, 13(1), 24-31.	https://www.ncbi.nlm.nih.gov/pubmed/16428919
66	Ginkgo	Ginkgo銀杏葉					Talinolol	Likely; A single oral dose of 120 mg GBE did not affect the pharmacokinetics of talinolol, a substrate of P-gp (不會顯著影響P-gp代謝西藥talinolol的藥物動力學)	Ten healthy male volunteers were selected to participate in a 3-stage sequential study (健康男性受試者)	N	N	10	Plasma concentration of talinolol within 24 hours were measured after talinolol 100mg was administrated alone and with a single oral 120 mg dose of GBE (檢測單服100mg 的 talinolol受試者脂血中濃度變化與有併服120 mg/d銀杏兩週後的變化 ))	N	Combination uses once with 120 mg GBE did not increased total body talinolol amount (單一給予120 mg/day GBE極可能不會影響健康人talinolol血中總量)	Effects of Ginkgo biloba extract ingestion on the pharmacokinetics of talinolol in healthy Chinese volunteers.	Fan, L.; Tao, G. Y.; Wang, G.; Chen, Y.; Zhang, W.; He, Y. J.; Li, Q.; Lei, H. P.; Jiang, F.; Hu, D. L.; Huang, Y. F.; Zhou, H. H.	Ann. Pharmacother., 2009, 43(5), 944-949.	https://www.ncbi.nlm.nih.gov/pubmed/19401473
67	Ginkgo	Ginkgo銀杏葉					Talinolol	Likely; Repeated consumption of GBE (360 mg/day) for 14 days increased the Cmax and AUC of talinolol by 36% and 26% significantly (顯著增加talinolol的最高血中濃度與總量)	Ten healthy male volunteers were selected to participate in a 3-stage sequential study (健康男性受試者)	N	N	10	Plasma concentration of talinolol within 24 hours were measured after talinolol 100mg was administrated alone and after 14 days repeated 360mg/day GBE ingestion (檢測單服100mg 的 talinolol受試者脂血中濃度變化與有併服360 mg/d銀杏兩週後的變化 )	Long-term use of GBE significantly influenced talinolol disposition in humans, likely by affecting the activity of P-glycoprotein and or other drug transporter (可能透過P-glycoprotein增加talinolol吸收)	Combination uses for two weeks increased total body talinolol amount；blood pressure control need to be concerned (持續併用360 mg/day GBE極可能增加健康人talinolol血中總量；需再留意對高血壓病人作用的差異)	Effects of Ginkgo biloba extract ingestion on the pharmacokinetics of talinolol in healthy Chinese volunteers.	Fan, L.; Tao, G. Y.; Wang, G.; Chen, Y.; Zhang, W.; He, Y. J.; Li, Q.; Lei, H. P.; Jiang, F.; Hu, D. L.; Huang, Y. F.; Zhou, H. H.	Ann. Pharmacother., 2009, 43(5), 944-949.	https://www.ncbi.nlm.nih.gov/pubmed/19401473
68	Ginkgo	Ginkgo銀杏葉		ginkgo EGb 761			Metformin	Possible; not significantly alter the pharmacokinetics and efficacy of metformin(不會顯著影響metformin的藥物動力學)	In diabetic patients (個案)	N	N	10	ginkgo EGb 761 single dose 120 mg/day for 3 months did not significantly alter the pharmacokinetics and efficacy of metformin at single 500 mg dose of metformin (non-diabetics) and the T2DM subject took his/her prescribed metformin dose (250-850 mg) with 120 mg EGb 761.(併服120 mg/d銀杏再給500 mg劑量的 metformin)	it is unknown whether a high dose > 120 mg/d of EGb 761 would enhance the hypoglycemic	combination uses of 120 mg/d of EGb 761 less than three month can be safe not to change metformin actions (短期併用120 mg/d of EGb 761不影響metformin代謝與功效)	The effect of the ingestion of Ginkgo biloba extract (EGb 761) on the pharmacokinetics of metformin in non-diabetic and type 2 diabetic subjects - a double blind placebo-controlled, crossover study.	Kudolo, G. B.; Wang, W.; Javors, M.; Blodgett, J.	Clin. Nutr., 2006, 25(4), 606-616.	https://www.ncbi.nlm.nih.gov/pubmed/16698134
69	Ginkgo	Ginkgo銀杏葉					Metformin	Likely; GKB extract added-on treatment significantly decreases HbA1c, FSG and insulin levels, IR, BMI, WC, VAI, serum leptin, and the inflammatory markers compared to baseline values (併用銀杏顯著降低HbA1c等數值)	a randomized, placebo-controlled, double-blinded clinical study in subjects with metabolic syndrome. (隨機對照雙盲試驗)	N	N	40	Patients were randomly allocated to administer GKB extract (120 mg capsule/day) or placebo (120 mg starch/day) as an add-on treatment with their currently used doses of Met for 90 days (隨機給予銀杏萃取120 mg或安慰劑在併服metformin)	N	The use of GKB extract as an adjuvant with Metformin was effective in improving the outcome of patients with metabolic syndrome (銀杏萃取與metformin併用可改善代謝症候群)	Efficacy and safety of Ginkgo biloba extract as an "add-on" treatment to metformin for patients with metabolic syndrome: a pilot clinical study.	Aziz TA, Hussain SA, Mahwi TO, Ahmed ZA.	Ther Clin Risk Manag. 2018 Jul 11;14:1219-1226	https://www.ncbi.nlm.nih.gov/pubmed/30034238
70	Ginkgo	Ginkgo銀杏葉	Ginkgo biloba				Sodium aescinate	Possible; Elevated serum creatinine and blood, urea and nitrogen (BUN) levels (併用會使血清肌酐和血液、尿素和BUN指數升高)	case report (個案)	N	N	1	58-year-old man with phalangeal fracture were given the anti-inﬂammatory and anti-oedematous agent sodium aescinate (10 mg q.d.) and anticoagulant ginkgo biloba extract by injection (58歲男性同時給予抗發炎、抗水腫藥物sodium aescinate且同時使用抗凝血藥物銀杏)	both competitively metabolized by CYP2C9 and CYP3A4 (同時競爭CYP2C9和CYP3A4的代謝)	Patients with renal impairment or concurrently taking other drugs with high protein binding should be closely monitored when using sodium aescinate (於腎功能不佳、或使用高蛋白結核藥物之病人，併用兩藥物時須密切監測腎功能指數)	Adverse event due to a likely interaction between sodium aescinate and Ginkgo biloba extract: a case report.	Ji H, Zhang G, Yue F, Zhou X.	J Clin Pharm Ther 2017; 42: 237–8.	https://www.ncbi.nlm.nih.gov/pubmed/28144968
71	Ginkgo	Ginkgo銀杏葉	Ginkgo biloba				Efavirenz	Possible; an intake of GBE can decrease human plasma EFV levels, may result in virological failure (可能會降低Efavirenz血中濃度，減少抗病毒效果)	case report for improving cognitive function (個案)	N	N	1	41-year-old man diagnosed with HIV who received antiretroviral therapy for 10 years. At the end of 2007, a virological failure developed. After directed questioning, the patient appeared to be using Ginkgo biloba for some months (41歲男性被診斷患愛滋病毒，接受治療10年，2007發現治療失敗，詢問後發現患者有同時服用銀杏葉)	terpenoids have caused the negative pharmacokinetic interaction with EFV either by induction of CYP3A4 or P-gp (銀杏可能誘導CYP3A4或P-gp以致促進Efavirenz代謝)	combination should be discouraged(不建議同時併用)	Interaction of Ginkgo biloba with efavirenz.	Wiegman DJ, Brinkman K, Franssen EJ.	AIDS. 2009 Jun 1;23(9):1184-5.	https://www.ncbi.nlm.nih.gov/pubmed/19451798
72	Ginkgo supplement	Ginkgo銀杏葉					Valproic acid and phenytoin	Possible; Seizure disorder leading to death while swimming(可能會引起癲癇)	case report for improving cognitive function (個案)	N	N	1	55-year-old man with a history of cerebrovascular accident following coronary artery bypass and seizure disorder (55歲男性具有心血管疾病史及患癲癇)	Indirect inhibition of glutamate decarboxylase and glycine activities due to inductive effect of G.biloba on CYP2C19 (銀杏可能誘導CYP2C19間接抑制麩胺酸脫羧酶及甘氨酸活性)	combination should be discouraged(不建議同時併用)	Fatal seizures due to potential herb-drug interactions with Ginkgo biloba.	Kupiec T, Raj V.	J Anal Toxicol 2005; 29: 755–8.	https://www.ncbi.nlm.nih.gov/pubmed/16419414
73	Ginkgo	Ginkgo銀杏葉	Ginkgo biloba	GBE 761			5-fluorouracil	Likely; 5-fluorouracil-induced adverse effects may be alleviated by Ginkgo with comparable response rates. The toxicity of the 5-FU/GBE 761 ONC combination was low. (併用銀杏可改善抗癌藥5-fluorouracil引起的副作用)	Phase II clinical trial under treatment with 5-fluorouracil combined with parenteral GBE 761 ONC in patients with pancreatic cancer (胰腺癌病人第二期臨床試驗)	N	N	48	Patients with locally or metastatic advanced pancreatic cancer were treated within a phase II study. The treatment was repeated every three weeks until progression. Response to therapy was evaluated after 2 and 4 treatment courses (於局部或轉移性晚期胰腺癌患者給予銀杏萃取物，於給藥後第2、4周進行療效評估)	N	combination can be beneficial (同時併用極可能有助於減少化療毒性)	Phase II study with 5-fluorouracil and ginkgo biloba extract (GBE 761 ONC) in patients with pancreatic Cancer.	Hauns, B.; Haring, B.; Kohler, S.; Mross, K.; Robben-Bathe, P.; Unger, C.	Arzneimittelforschung, 1999, 49(12), 1030-1034.	https://www.ncbi.nlm.nih.gov/pubmed/10635450
74	Ginkgo biloba	Ginkgo銀杏葉					Raltegravir	Likely; Ginkgo biloba did not reduce raltegravir exposure (銀杏不會降低raltegravir 的體內總量)	open-label, randomized, two-period, crossover phase I trial in 18 healthy volunteers (無雙盲之隨機臨床試驗)	N	N	18	Healthy volunteers (健康受試者)	N	raltegravir can be used safely for the management of HIV infection when taken in combination with ginkgo biloba (raltegravir可與銀杏併用)	Effect of Ginkgo Biloba on the Pharmacokinetics of Raltegravir in Healthy Volunteers	Maren Blonk, Angela Colbers, Anne Poirters, Bas Schouwenberg, and David Burgera	Antimicrob Agents Chemother. 2012; 56(10): 5070–5075.	https://www.ncbi.nlm.nih.gov/pmc/articles/PMC3457394/
75	Ginkgo biloba	Ginkgo銀杏葉		Ginkgolides			Midazolam	Possible; no significant effects on the pharmacokinetics of MDZ in subjects after repeated dosing of Ginkgo terpene lactones meglumine injection (給予銀杏注射劑GMI不會顯著改變midazolam藥物動力學)	open-label, placebo-controlled study(無雙盲之隨機-安慰劑對照臨床試驗)	N	N	15	Healthy Chinese male subject (男性健康華人)	GMI appeared neither to inhibit nor to induce CYP3A4 (銀杏注射劑GMI無改變負責midazolam代謝的CYP3A4)	co-administration of GMI (Ginkgo terpene lactones meglumine injection) with MDZ (midazolam) in healthy Chinese male subjects were well tolerated and had an acceptable safety profile (男性健康者能安全耐受併用midazolam與銀杏注射劑)	Pharmacokinetics of ginkgolides A, B and K after single and multiple intravenous infusions and their interactions with midazolam in healthy Chinese male subjects.	Shao F, Zhang H, Xie L, Chen J, Zhou S, Zhang J, Lv J, Hao W, Ma Y, Liu Y, Ou N, Xiao W	Eur J Clin Pharmacol. 2017; 73(5):537-546.	https://www.ncbi.nlm.nih.gov/pubmed/28105513
76	Danggui	Danggui 當歸					Warfarin	Unevaluable; no significant difference in increased PT and warfarin conc. after the Danggui treatment (併用當歸對warfarin濃度或延長凝血時間無顯著改變)	rabbits were given daily subcutaneous doses of 0.6 mg/kg warfarin followed by 3 day treatment with oral 2 g/kg twice daily Danggui extract (先給予兔子三日0.6 mg/kg warfarin後再併用4 g/kg/d Danggui extract)	N	Y	-	N	Danggui contains coumarin derivatives (當歸含有類似warfarin結構衍生勿	two rabbits died after day 7 of the co-treatment. concurrent use of dong quai with warfarin should be avoided (六隻實驗兔有兩隻於併用七日後死亡；應避免兩者併用)	Danggui (Angelica sinensis) affects the pharmacodynamics but not the pharmacokinetics of warfarin in rabbits.	Lo, A.C., Chan, K., Yeung, J.H., Woo, K.S.	European Journal of Drug Metabolism and Pharmacokinetics 1995; 20 (1), 55–60.	https://www.ncbi.nlm.nih.gov/pubmed/7588995
77	Dong quai	Danggui 當歸					Warfarin	Possible; related to herb intake; 2-fold increase PT and raised INR of 4.05 and 4.90 (很可能與併用有關；凝血酵素原時間增加兩倍且INR值上升至4.05 and 4.90)	case report (個案)	N	N	1	a 46-year-old woman on warfarin 5 mg/day and oral dong quai administration of 565 mg 1–2 times daily (46歲女性每日服用warfarin 5 mg與dong quai 565-1130 mg)	Possible inhibition of platelet activity by dong quai (當歸可能具抗血小板活性作用)	discontinued co-intake dong quai for a month, her INR dropped to 2.48. Potentiation of warfarin by dong quai (停止併用當歸一個月後INR值可下降至2.48，顯示當歸能增強warfarin作用)	Potentiation of warfarin by dong quai.	Page RL 2nd, Lawrence JD	Pharmacotherapy 1999; 19 (7), 870–878.	https://www.ncbi.nlm.nih.gov/pubmed/10417036
78	Danggui	Danggui 當歸	Angelica sinensis	GNC Herbal Plus ® FingerprintedTM Dong Quai 500 mg,			Aspirin	Possible; Combine herbal product with aspirin did not aggravate platelet inhibition caused by aspirin (併用當歸對aspirin並未增加其抗血小板活性)	a randomized, double-blind, placebo-controlled trial involving healthy volunteers (隨機雙盲以安慰劑對照之健康人試驗)	N	N	25	Each subject underwent 3 phases comprising of herbal product alone, aspirin alone and aspirin with herbal product (GNC Herbal Plus ® FingerprintedTM Dong Quai 500 mg, where each phase lasted for 3 weeks with 2 weeks of washout between phases (受試者皆接受兩藥物個別測試或併用各三週換藥空窗期為兩週)	angelica polysaccharide promote on blood coagulation and platelet aggregation (當歸多醣提升凝血與血小板凝集)	healthy volunteers lack of bleeding risks either used alone or in combination with aspirin (健康受試者無論單獨服用或併用皆無出血風險)	A randomized, double-blind, placebo- controlled study on the anti-haemostatic effects of Curcuma longa, Angelica sinensis and Panax ginseng.	Fung FY, Wong WH, Ang SK, Koh HL, Kun MC, Lee LH, Li X, Ng HJ, Tan CW, Zhao Y, Linn YC.	Phytomedicine. 2017; 32:88-96.	https://www.ncbi.nlm.nih.gov/pubmed/28732813
79	Dong Quai	Danggui 當歸	Angelicae sinensis				Aspirin	Possible; Aspirin reduced endogenous thrombin indicators not aggravated by concomitant administration (併用當歸對aspirin並未增加其抗血小板活性)	A randomized, double-blind, placebo-controlled crossover study (隨機雙盲以安慰劑對照之交叉設計健康人試驗)	N	N	25	healthy volunteers assigned to 1000mg Dong Quai 3 weeks, followed by a 2-week wash out period, then randomly assigned with or without aspirin 100mg 3 weeks. Following another 2 week washout, the subjects crossed over for next 3 weeks (服用1000 mg 當歸三週停用兩週後其中一組併用三週aspirin 100 mg；停用兩週後再交叉試驗)	N	The concurrent usage of aspirin with Dong Quai individually was safe with no clinical bleeding (併用三週與未併用組皆安全無出血)	A Randomized, Double Blind, Placebo-Controlled, Cross-over Study to Evaluate the Haemostatic Effects of Three Commonly Used Traditional Herbal Medicines, (Curcuma Longa, Angelicae Sinensis and Panax Ginseng)and Their Interactions with Aspirin	Lai Heng Lee, Chuen Wen Tan, Wan Hui Wong, Foon yin Fung, Hwee Ling Koh, Yan Zhao, Mei Ching Kun, Xiao Mei Li, Heng Joo Ng, Seng Kok Ang and Yeh Ching Linn	Blood 2015 126:2323	http://www.bloodjournal.org/content/126/23/2323?sso-checked=true
80	Dong Quai	Danggui 當歸	angelica sinensis				Luteinizing hormone-releasing hormone	Possible; no significant differences in the severity, frequency or duration of hot flashes among men receiving placebo or Dong Quai (兩組皆無顯著改善前列腺癌病人潮熱嚴重度或頻次)	A randomized double-blind placebo controlled trial in prostate cancer patients (隨機雙盲以安慰劑對照之前列腺癌臨床試驗)	N	N	22	luteinizing hormone-releasing hormone agonist therapy with or without Dong Quai for 3 months for prostate cancer patients to monitor the frequency, duration and severity of bothersome hot flashes (監測併用或未併用三個月當歸對前列腺癌病人接受荷爾蒙治療嘲熱成效)	N	no beneficial while combined uses (同時併用可能無助於減少不適的症狀)	Dong Quai (angelica sinensis) in the treatment of hot flashes for men on androgen deprivation therapy: results of a randomized double-blind placebo controlled trial.	Al-Bareeq RJ, Ray AA, Nott L, Pautler SE, Razvi H.	Can Urol Assoc J. 2010; 4(1):49-53.	https://www.ncbi.nlm.nih.gov/pubmed/20165579
